# Supplementary material
Source: publisher figshare collection journal article supplement (https://acs.figshare.com/ndownloader/files/4259629)
Supplement: Supplementary file 1 [file 4259629]

# **Core-shell Structured Carbonyl Iron Microspheres**

## **Prepared via Dual-step Functionality Coatings and Their**

### **Magnetorheological Response**

*Fei Fei Fang,<sup>1</sup> Ying Dan Liu,<sup>1</sup> Hyoung Jin Choi,<sup>1\*</sup> Yongsok Seo<sup>2\*</sup>*

<sup>1</sup>Department of Polymer Science and Engineering, Inha University, Incheon 402-751, Korea

<sup>2</sup>Intellectual Textile System Research Center (ITRC) and School of Materials Science and Engineering, College of Engineering, Seoul National University, Seoul 151-744, Korea

Corresponding authors: E-mail: [hjchoi@inha.ac.kr](mailto:hjchoi@inha.ac.kr) and [ysseo@snu.ac.kr](mailto:ysseo@snu.ac.kr)

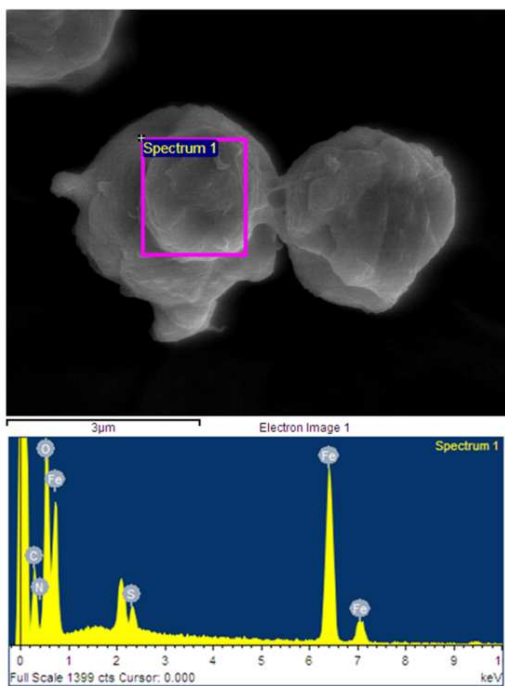

**Figure S1:** EDS spectra of PANI coated CI particles.

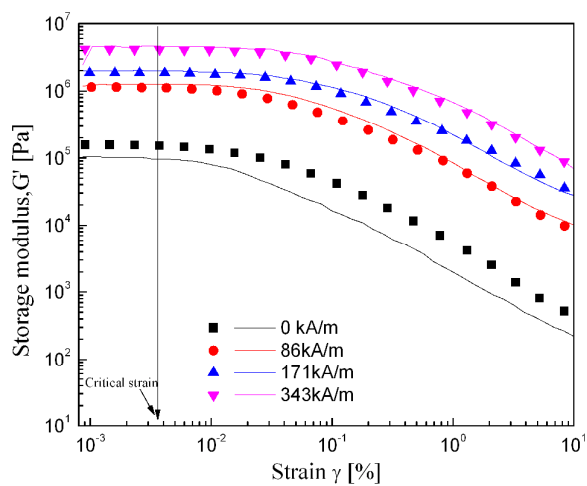

**Figure S2:** Amplitude sweep of pure CI (solid line) and MWCNT/PANI/CI (symbol) suspensions under different magnetic field strengths.

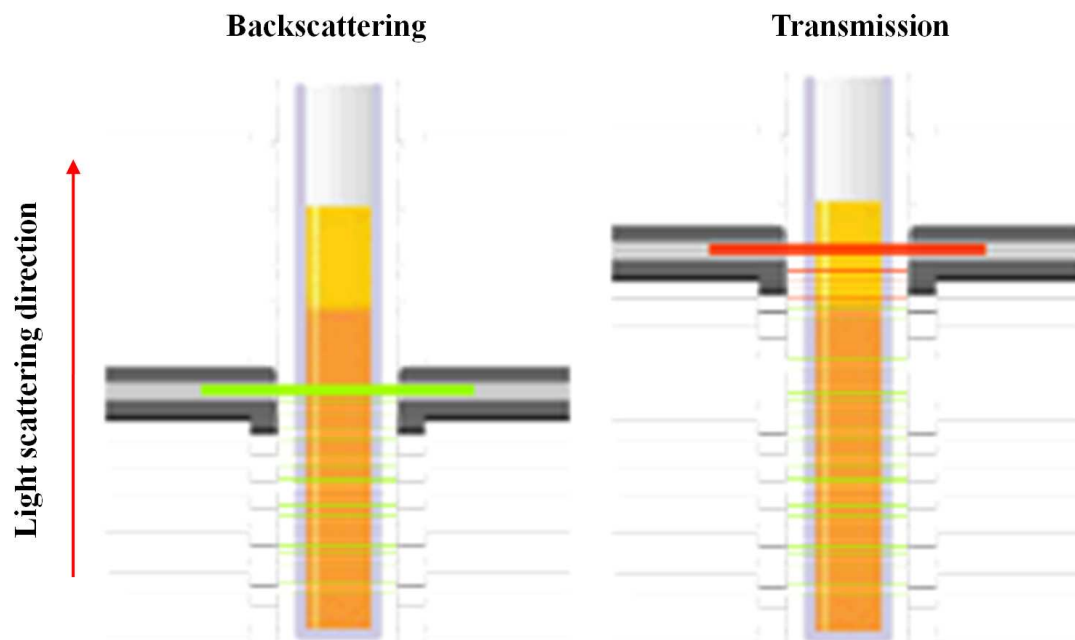

**Figure S3:** Scan mode of the Turbiscan Lab.

The employed Turbiscan (Fomulation, Turbiscan lab) equipment uses Multiple Light Scattering technique to detect and determine the destabilizing phenomena happened in dispersed system which can be concentrated or dilute. The Turbiscan lab reading head consists of pulsed near infrared light source (880 nm) and two synchronous detectors. The transmission detector receives the light going out of the sample at  $0^\circ$  from the incident beam, while the backscattering detector receives the light scattered by the sample at  $135^\circ$  from the incident beam. The results from transmission are presented as the sedimentation profile *i.e.*, delta transmission flux *versus* time. The backscattering (BS) and transmittance ( $T$ ) of incident light are measured by calculating transport mean free path of photons ( $l^*$ ) throughout the medium. Based on Mie theory, the BS and T can be obtained for a concentrated suspension as follows:

$$BS \approx (\frac{1}{\ell^*})^{1/2}$$

(1)

$$T = \exp(\frac{-r}{\ell})$$

(2)

Here,  $r$  is an internal radius of a measurement cell. The photon transport mean free path ( $\ell^*$ ) and photon mean free path ( $\ell$ ) are defined as:

$$\ell^* \approx \frac{2d}{3\phi (1-g)Q_s}$$

(3)

$$\ell = \frac{2d}{3\phi Q_s}$$

(4)

where  $d$ ,  $\phi$ ,  $g$ , and  $Q_s$  denote a particle mean diameter, the volume fraction of a dispersed phase, asymmetry factor, and scattering efficiency factor, respectively.
